# Supplementary material
Source: Springer Nature journal article supplement (https://www.springermedizin.de/resource/supplementary/13223_2013_503_MOESM4_ESM.pdf/9596654)

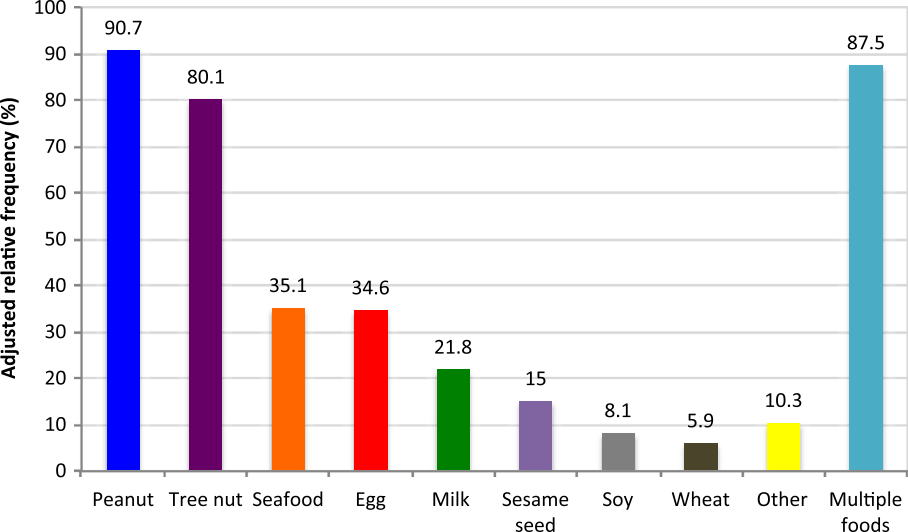

Supplement: MOESM4 [file 9596654]
